# Supplementary material for: Efficient and recyclable Nd3+-doped CoFe2O4 for boosted visible light-driven photocatalytic degradation of Rhodamine B dye
Source: Royal Society of Chemistry journal article supplement (doi:10.1039/d3ra00971h), 2023-01-01
Supplement: d3ra00971h1.pdf [file d3ra00971h1.pdf]

## Supplementary information

### Efficient and recyclable Nd<sup>3+</sup>-doped CoFe<sub>2</sub>O<sub>4</sub> for boosted visible light-driven photocatalytic degradation of Rhodamine B dye

Loan T. T. Nguyen,<sup>1</sup> Hang T. T. Nguyen,<sup>2</sup> Lan T. H. Nguyen,<sup>1</sup> Anh T. T. Duong,<sup>1</sup> Hai Q. Nguyen,<sup>1</sup> Viet T. M. Ngo,<sup>1</sup> Nhuong V. Vu,<sup>1</sup> Duyen Thi Cam Nguyen,<sup>3,4</sup> Thuan Van Tran<sup>3,4,\*</sup>

#### Affiliation

<sup>1</sup> Faculty of Chemistry, Thai Nguyen University of Education, Thai Nguyen 240000, Vietnam.

<sup>2</sup> Faculty of Automotive and Power Machinery Engineering, Thai Nguyen University of Technology, Thai Nguyen 24000, Vietnam.

<sup>3</sup> Institute of Applied Technology and Sustainable Development, Nguyen Tat Thanh University, 298-300A Nguyen Tat Thanh, District 4, Ho Chi Minh City 755414, Vietnam.

<sup>4</sup> Faculty of Environmental and Food Engineering, Nguyen Tat Thanh University, 298-300A Nguyen Tat Thanh, District 4, Ho Chi Minh City 755414, Vietnam.

#### Correspondence

\* To whom correspondence should be addressed: Thuan Van Tran (Email: [tranvt@ntt.edu.vn](mailto:tranvt@ntt.edu.vn), [ttran@gradcenter.cuny.edu](mailto:ttran@gradcenter.cuny.edu), [tranuv@gmail.com](mailto:tranuv@gmail.com)), Tel: (+84)-028-3941-1211, Fax: (+84)-028-39-404-759.

## Chemicals

Several chemicals, e.g.,  $\text{Co}(\text{NO}_3)_2 \cdot 4\text{H}_2\text{O}$  (98.0%),  $\text{Nd}(\text{NO}_3)_3 \cdot 6\text{H}_2\text{O}$  (99.0%),  $\text{Fe}(\text{NO}_3)_3 \cdot 9\text{H}_2\text{O}$  (98.0%), and urea  $\text{CO}(\text{NH}_2)_2$  (99.0%) in this work were purchased from Merck, USA.

## Characterization

XRD patterns were conducted on the D8 Advance diffractometer (Bruker, Madison, WI, USA) with the  $\text{CuK}\alpha$  radiation ( $\lambda = 1.5406 \text{ \AA}$ ) beams as excitation sources.

The particle morphology and size of the samples were recorded on SEM technique on a multi-purpose scanning electron microscope JSM-6510 (JEOL/EO, Tokyo, Japan) equipped with energy dispersive X-ray (EDX) spectroscopy.

The optical absorption characterization of the photocatalysts were determined using UV-Vis DRS on the Hitachi U-4100 spectrophotometer (Hitachi, Kyoto, Japan) in the wavelength range of  $200\text{--}900 \text{ nm}$ .

The  $\text{N}_2$  adsorption/desorption isotherms for surface area and pore distribution measurements were determined using Brunauer–Emmett–Teller (BET) and Barrett–Joyner–Halenda (BJH) methods, respectively and recorded on the Micromeritics TriStar 3000 V6.07 (Micromeritics Inc., Norcross, GA, USA).

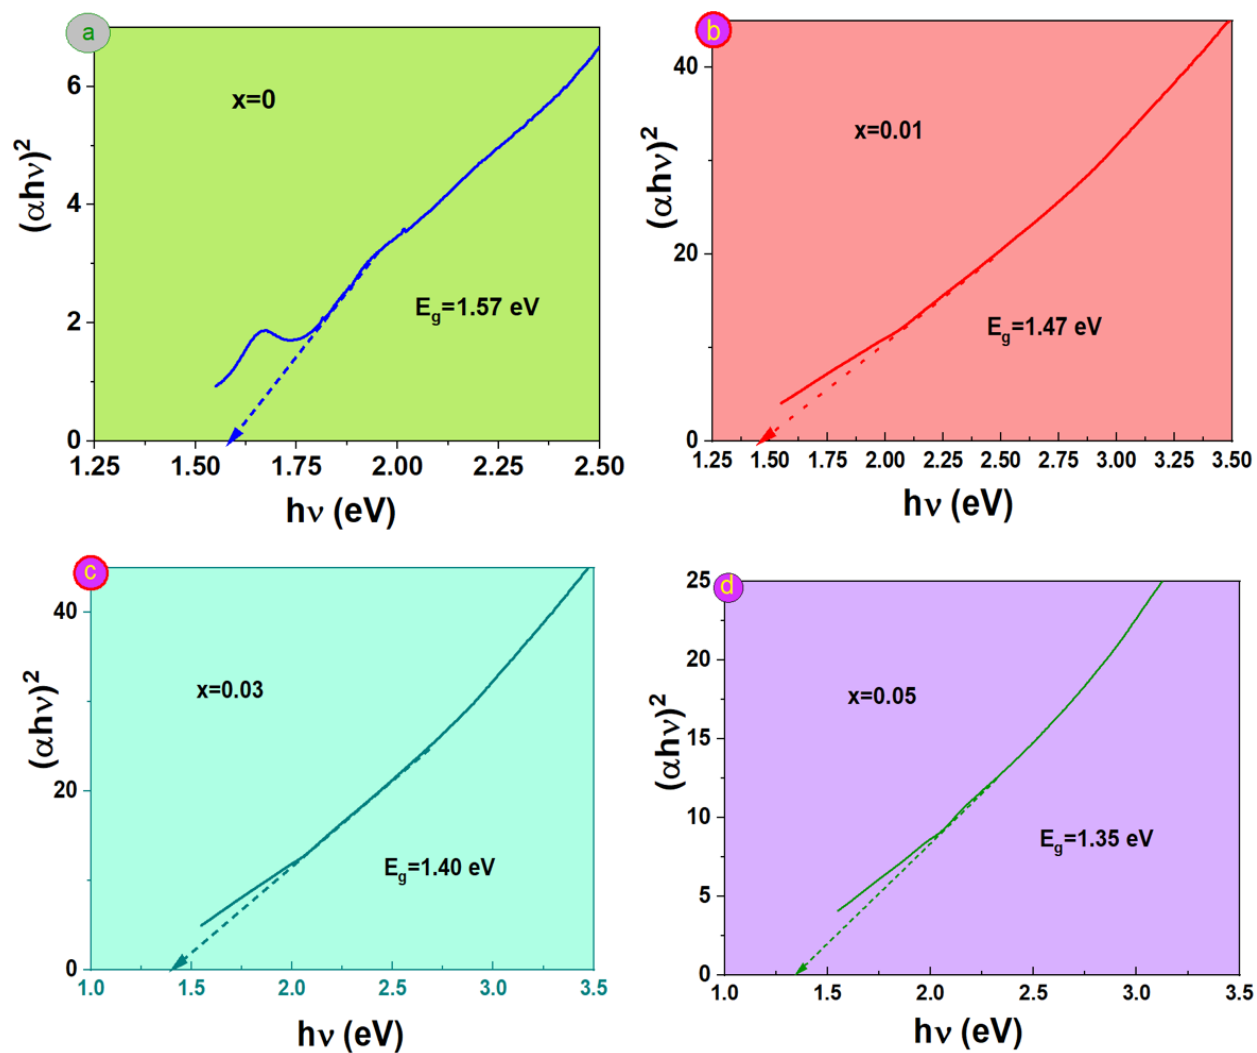

**Fig. S1.** UV–Vis diffuse reflectance spectra with Tauc plots of  $(\alpha h\nu)^2$  against photon energy ( $h\nu$ ) of (a)  $\text{CoFe}_2\text{O}_4$ , (b)  $\text{CoNd}_{0.01}\text{Fe}_{1.99}\text{O}_4$ , (c)  $\text{CoNd}_{0.03}\text{Fe}_{1.97}\text{O}_4$ , and (d)  $\text{CoNd}_{0.05}\text{Fe}_{1.95}\text{O}_4$  catalysts.

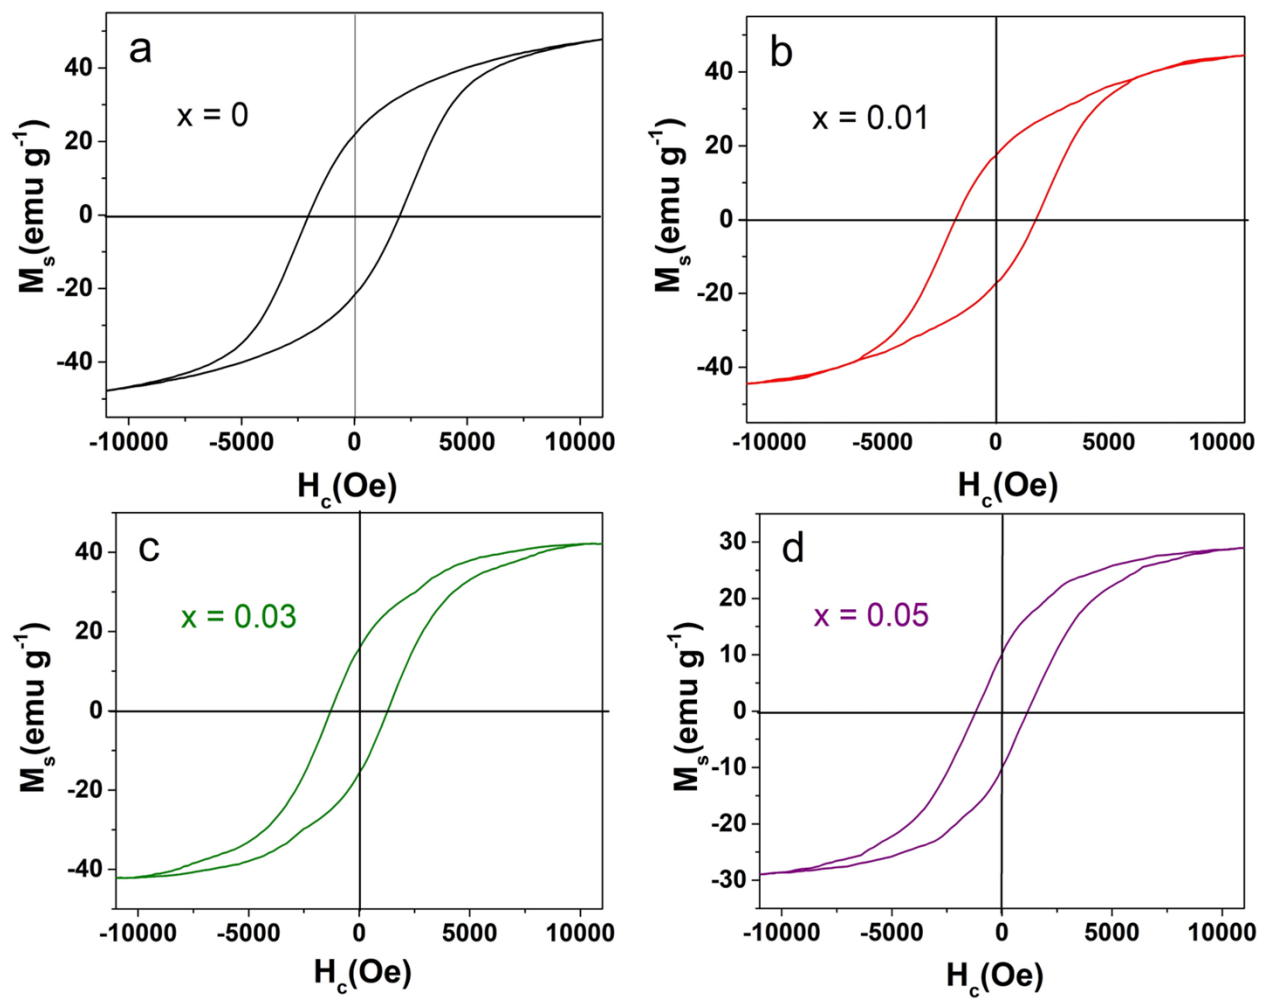

**Fig. S2.** Magnetic properties of (a) CoFe<sub>2</sub>O<sub>4</sub>, (b) CoNd<sub>0.01</sub>Fe<sub>1.99</sub>O<sub>4</sub>, (c) CoNd<sub>0.03</sub>Fe<sub>1.97</sub>O<sub>4</sub>, and (d) CoNd<sub>0.05</sub>Fe<sub>1.95</sub>O<sub>4</sub> catalysts.

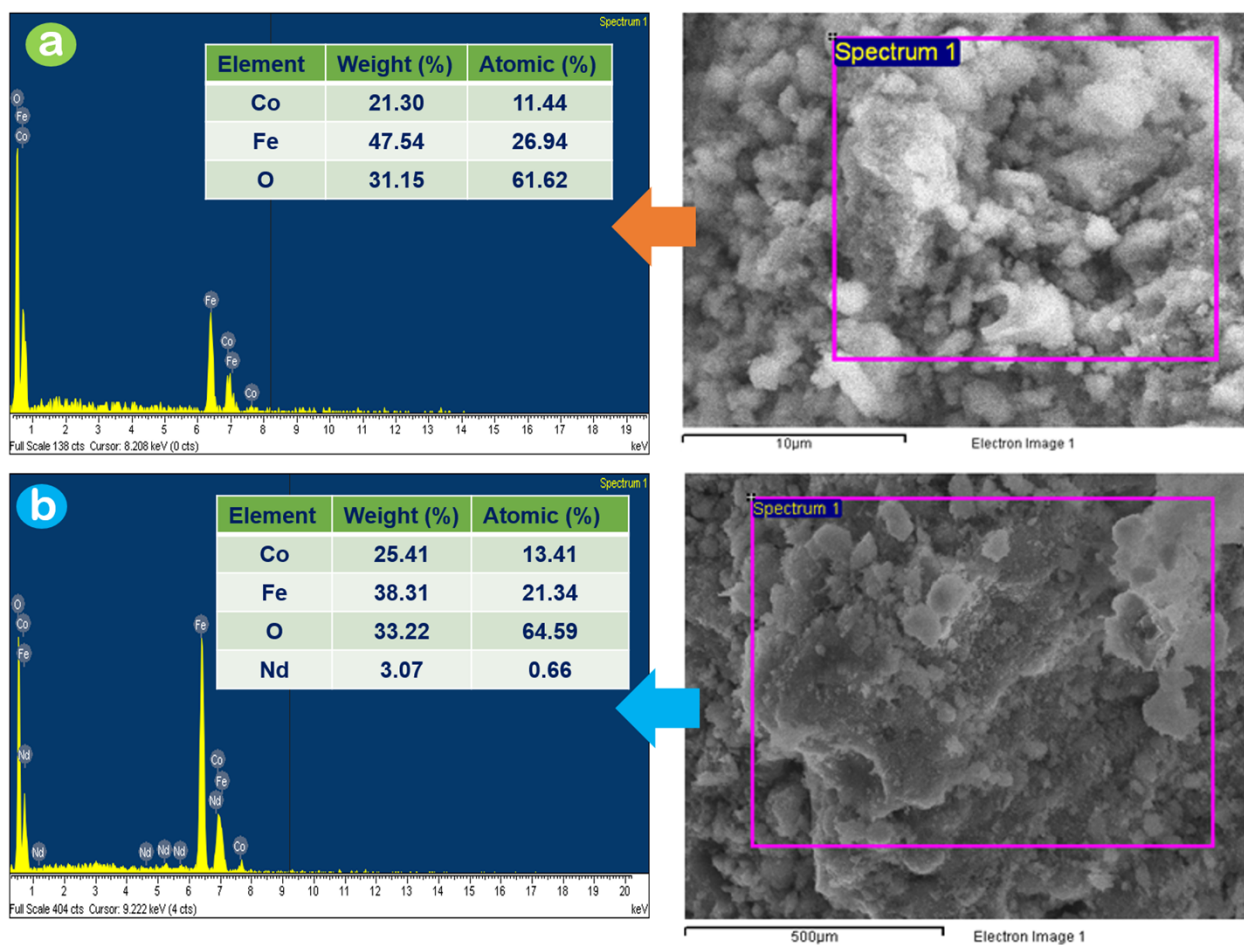

**Fig. S3.** Energy-dispersive X-ray spectroscopy analysis and chemical composition of (a)  $\text{CoFe}_2\text{O}_4$ , (b)  $\text{CoNd}_{0.05}\text{Fe}_{1.95}\text{O}_4$  catalysts.

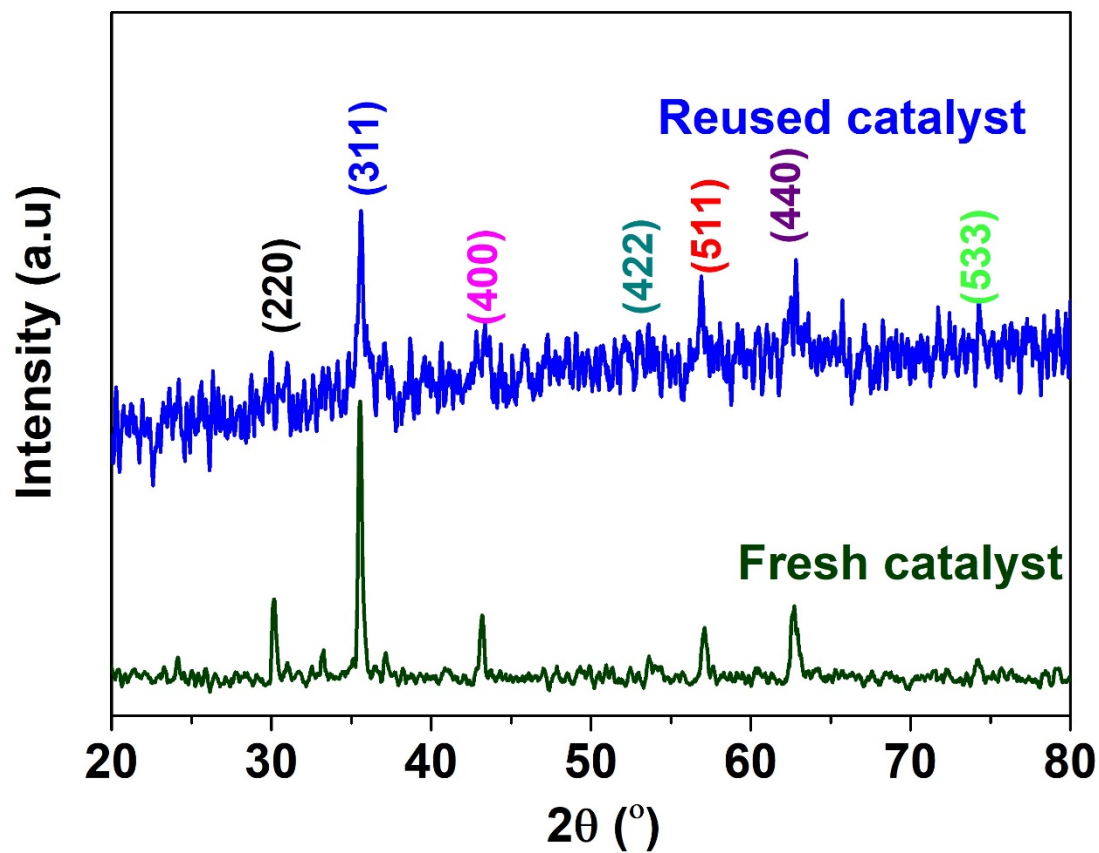

**Fig. S4.** The XRD patterns for fresh and reused  $\text{CoNd}_{0.05}\text{Fe}_{1.95}\text{O}_4$  catalysts.

**Table S1.** The angle value ( $2\theta$ ) at lattice plane (331), particle size ( $r$ ), typical FTIR absorbance bands of Nd–O bonds for tetrahedral sites ( $\nu_1$ ) and octahedral sites ( $\nu_2$ ) of  $\text{CoNd}_x\text{Fe}_{2-x}\text{O}_4$  ( $x = 0, 0.01, 0.03, 0.05$ ) catalysts.

| No | Catalyst                                       | $2\theta$ ( $^\circ$ ) | $r$ (nm) | $\nu_1$ ( $\text{cm}^{-1}$ ) | $\nu_2$ ( $\text{cm}^{-1}$ ) |
|----|------------------------------------------------|------------------------|----------|------------------------------|------------------------------|
| 1  | $\text{CoFe}_2\text{O}_4$                      | 35.27                  | 14.35    | 551.6                        | 424.3                        |
| 2  | $\text{CoNd}_{0.01}\text{Fe}_{1.99}\text{O}_4$ | 35.35                  | 19.05    | 582.5                        | 474.5                        |
| 3  | $\text{CoNd}_{0.03}\text{Fe}_{1.97}\text{O}_4$ | 35.51                  | 26.74    | 590.2                        | 482.2                        |
| 4  | $\text{CoNd}_{0.05}\text{Fe}_{1.95}\text{O}_4$ | 35.60                  | 29.14    | 591.0                        | 484.5                        |

**Table S2.** Textual properties of  $\text{CoNd}_x\text{Fe}_{2-x}\text{O}_4$  ( $x = 0, 0.05$ ) catalysts.

| Surface property      | $\text{CoNd}_x\text{Fe}_{2-x}\text{O}_4$ ( $x = 0$ ) | $\text{CoNd}_x\text{Fe}_{2-x}\text{O}_4$ ( $x = 0.05$ ) |
|-----------------------|------------------------------------------------------|---------------------------------------------------------|
| Specific surface area | 12.7 ( $\text{m}^2 \text{g}^{-1}$ )                  | 35.0 ( $\text{m}^2 \text{g}^{-1}$ )                     |
| Total pore volume     | 0.099 ( $\text{cm}^3 \text{g}^{-1}$ )                | 0.114 ( $\text{cm}^3 \text{g}^{-1}$ )                   |
| Average pore width    | 32.8 (nm)                                            | 12.6 (nm)                                               |

**Table S3.** Degradation efficiency (H, %), degradation kinetic rate ( $k_1$ ,  $\text{min}^{-1}$ ), coefficient of determination ( $R^2$ ) of removal of RhB dye using various  $\text{CoNd}_x\text{Fe}_{2-x}\text{O}_4$  ( $x = 0, 0.01, 0.03, 0.05$ ) catalyst under visible light.

| No | Catalyst                                                              | H (%) | $k_1 \cdot 10^3$ ( $\text{min}^{-1}$ ) | $R^2$ |
|----|-----------------------------------------------------------------------|-------|----------------------------------------|-------|
| 1  | $\text{H}_2\text{O}_2$ only                                           | 12.9  | 0.7                                    | 0.99  |
| 2  | Catalyst only                                                         | 29.4  | 1.4                                    | 0.98  |
| 3  | $\text{H}_2\text{O}_2 + \text{CoFe}_2\text{O}_4$                      | 71.7  | 3.9                                    | 0.99  |
| 4  | $\text{H}_2\text{O}_2 + \text{CoNd}_{0.01}\text{Fe}_{1.99}\text{O}_4$ | 75.9  | 4.1                                    | 0.99  |
| 5  | $\text{H}_2\text{O}_2 + \text{CoNd}_{0.03}\text{Fe}_{1.97}\text{O}_4$ | 88.2  | 4.9                                    | 1.00  |
| 6  | $\text{H}_2\text{O}_2 + \text{CoNd}_{0.05}\text{Fe}_{1.95}\text{O}_4$ | 94.7  | 5.3                                    | 0.96  |

**Table S4.** Degradation efficiency (H, %), degradation kinetic rate ( $k_1$ ,  $\text{min}^{-1}$ ), coefficient of determination ( $R^2$ ) under  $\text{CoNd}_{0.05}\text{Fe}_{1.95}\text{O}_4$  catalyst with and without addition of scavengers (e.g., ascorbic acid, ethylenediaminetetraacetic acid (EDTA), and isopropyl alcohol).

| $\text{ZnLa}_{0.05}\text{Fe}_{1.95}\text{O}_4$ | No scavenger | With ascorbic acid | With isopropyl alcohol | With EDTA |
|------------------------------------------------|--------------|--------------------|------------------------|-----------|
| H (%)                                          | 93.7         | 61.6               | 52.1                   | 49.8      |
| $k_1 \cdot 10^3$ ( $\text{min}^{-1}$ )         | 5.3          | 3.4                | 2.9                    | 2.7       |
| $R^2$                                          | 0.96         | 0.99               | 1.00                   | 0.99      |

Note:  $[\text{RhB}] = 10 \text{ mg L}^{-1}$ , Duration = 0–180 min,  $[\text{H}_2\text{O}_2] = 0.1 \text{ M}$ ,  $[\text{catalyst}] = 0.75 \text{ g L}^{-1}$ ,  $V = 100 \text{ mL}$ ,  $T = 25 \pm 1 \text{ }^\circ\text{C}$ , agitation speed: 200 rpm, and pH 7 under LED visible light source.
